# Supplementary material for: Adaptive Mutations in Influenza A/California/07/2009 Enhance Polymerase Activity and Infectious Virion Production
Source: PubMed Central journal article supplement (PMC5977265; doi:10.3390/v10050272), 2018-05-18
Supplement: viruses-10-00272-s001.pdf [file viruses-10-00272-s001.pdf]

**Table S1.**

| Segment | Length (nt) | CA/07 (parental) |                |        | CA/07-MA |                |         |
|---------|-------------|------------------|----------------|--------|----------|----------------|---------|
|         |             | Reads            | Junction Reads |        | Reads    | Junction Reads |         |
|         |             |                  | Reads          | RPM    |          | Reads          | RPM     |
| PB2     | 2,341       | 54,846           | 1,488          | 27,131 | 101,081  | 10,992         | 108,744 |
| PB1     | 2,341       | 78,165           | 329            | 4,209  | 68,778   | 1,069          | 15,543  |
| PA      | 2,236       | 9,237            | 36             | 3,897  | 4,079    | 0              | 0       |
| HA      | 1,777       | 41,576           | 406            | 9,765  | 24,717   | 96             | 3,884   |
| NP      | 1,565       | 42,013           | 2              | 48     | 27,609   | 0              | 0       |
| NA      | 1,458       | 17,215           | 0              | 0      | 10,275   | 0              | 0       |
| M       | 1,027       | 40,315           | 1              | 25     | 31,803   | 0              | 0       |
| NS      | 890         | 86,919           | 169            | 1,944  | 57,800   | 25             | 433     |
| total   | 13,635      | 370,286          | 2,431          | 47,019 | 326,142  | 12,182         | 128,604 |

**HISAT2 analysis of junction reads.** Paired reads were trimmed and aligned to reference sequences using HiSat2 to quantify DVG junction-spanning reads. The relative abundance of junction reads was expressed as number of reads per million reads aligned to each segment (RPM). HiSat2 program reference: Bolger, A. M., Lohse, M., & Usadel, B. (2014). Trimmomatic: A flexible trimmer for Illumina Sequence Data. *Bioinformatics*, btu170.

Table S2.

| MA vs Parental |              |           |        |           |             |          |     |         |              |              |  |
|----------------|--------------|-----------|--------|-----------|-------------|----------|-----|---------|--------------|--------------|--|
| Segment        | Nucleotide # | Reference | Change | Frequency | Log p value | Coverage | ORF | Codon # | Codon change | Substitution |  |
| 1              | 162          | A         | G      | 0.013     | -460        | 26101    | PB2 | 54      | AGA -> AGG   | none         |  |
| 1              | 196          | A         | G      | 0.012     | -230        | 15265    | PB2 | 66      | AUG -> GUG   | M -> V       |  |
| 1              | 217          | C         | A      | 0.032     | -597        | 12107    | PB2 | 73      | CAA -> AAA   | Q -> K       |  |
| 1              | 242          | C         | A      | 0.014     | -128        | 8440     | PB2 | 81      | ACA -> AAA   | T -> K       |  |
| 1              | 244          | A         | C      | 0.013     | -78         | 8316     | PB2 | 82      | AAC -> CAC   | N -> H       |  |
| 1              | 275          | C         | G      | 0.019     | -61         | 2104     | PB2 | 92      | UCA -> UGA*  | S -> Stop    |  |
| 1              | 282          | G         | U      | 0.013     | -21         | 1696     | PB2 | 94      | CUG -> CUU   | none         |  |
| 1              | 309          | C         | U      | 0.019     | -36         | 1296     | PB2 | 103     | GGC -> GGU   | none         |  |
| 1              | 338          | A         | G      | 0.016     | -22         | 1222     | PB2 | 113     | AAG -> AGG   | K -> R       |  |
| 1              | 340          | G         | C      | 0.013     | -18         | 1269     | PB2 | 114     | GUA -> CUA   | V -> L       |  |
| 1              | 353          | A         | U      | 0.012     | -14         | 1105     | PB2 | 118     | UAU -> UUU   | Y -> F       |  |
| 1              | 575          | A         | G      | 0.012     | -6          | 1096     | PB2 | 192     | GAG -> GGG   | E -> G       |  |
| 1              | 664          | G         | A      | 0.012     | -17         | 1128     | PB2 | 222     | GGC -> AGC   | G -> S       |  |
| 1              | 807          | A         | G      | 0.013     | -6          | 1235     | PB2 | 269     | AGA -> AGG   | none         |  |
| 1              | 1543         | C         | A      | 0.010     | -17         | 1758     | PB2 | 515     | CCC -> ACC   | P -> T       |  |
| 1              | 1928         | C         | A      | 0.015     | -40         | 2020     | PB2 | 643     | UCA -> UAA*  | S -> Stop    |  |
| 1              | 2021         | C         | A      | 0.019     | -119        | 6880     | PB2 | 674     | GCA -> GAA   | A -> E       |  |
| 1              | 2026         | A         | U      | 0.011     | -68         | 7278     | PB2 | 676     | ACU -> UCU   | T -> S       |  |
| 1              | 2142         | C         | A      | 0.014     | -326        | 21255    | PB2 | 714     | AGC -> AGA   | S -> R       |  |
| 1              | 2187         | G         | A      | 0.038     | -2445       | 40658    | PB2 | 729     | GGG -> GGA   | none         |  |
| 2              | 78           | A         | G      | 0.010     | -323        | 36526    | PB1 | 26      | GGA -> GGG   | none         |  |
| 2              | 200          | A         | G      | 0.013     | -240        | 12285    | PB1 | 67      | AAC -> AGC   | N -> S       |  |
| 2              | 237          | A         | C      | 0.015     | -182        | 10411    | PB1 | 79      | CCA -> CCC   | none         |  |
| 2              | 279          | U         | C      | 0.014     | -101        | 6695     | PB1 | 93      | GCU -> GCC   | none         |  |
| 2              | 466          | A         | G      | 0.363     | -5947       | 5829     | PB1 | 156     | ACA -> GCA   | T -> A       |  |
| 2              | 1023         | C         | U      | 0.996     | -23542      | 6574     | PB1 | 341     | CCC -> CCU   | none         |  |
| 2              | 1047         | A         | U      | 0.017     | -139        | 6092     | PB1 | 349     | GCA -> GCU   | none         |  |
| 2              | 1323         | C         | A      | 0.999     | -27241      | 7583     | PB1 | 441     | CUC -> CUA   | none         |  |
| 2              | 1891         | U         | C      | 0.034     | -447        | 8054     | PB1 | 631     | UUU -> CUU   | F -> L       |  |
| 2              | 1934         | U         | A      | 0.011     | -108        | 8813     | PB1 | 645     | GUA -> GAA   | V -> E       |  |
| 2              | 2218         | U         | C      | 0.498     | -10861      | 72743    | PB1 | 740     | UUC -> CUC   | F -> L       |  |
| 3              | 7            | G         | A      | 0.029     | -78         | 1669     | PA  | 3       | GAC -> AAC   | D -> N       |  |
| 3              | 9            | C         | A      | 0.023     | -58         | 1632     | PA  | 3       | GAC -> GAA   | D -> E       |  |
| 3              | 53           | R         | G      | 0.992     | -5368       | 1509     | PA  | 18      | GRA -> GGA   | X -> G       |  |
| 3              | 234          | A         | U      | 0.011     | -8          | 634      | PA  | 78      | AUA -> AUU   | none         |  |
| 3              | 246          | A         | G      | 0.011     | -6          | 563      | PA  | 82      | AGA -> AGG   | none         |  |
| 3              | 622          | A         | G      | 0.033     | -26         | 484      | PA  | 208     | ACA -> GCA   | T -> A       |  |
| 3              | 841          | A         | U      | 0.015     | -11         | 393      | PA  | 281     | AAG -> UAG*  | K -> Stop    |  |
| 3              | 1046         | A         | G      | 1.000     | -2132       | 592      | PA  | 349     | GAA -> GGA   | E -> G       |  |
| 3              | 1313         | U         | G      | 0.014     | -9          | 655      | PA  | 438     | AUC -> AGC   | I -> S       |  |
| 3              | 1322         | U         | G      | 0.017     | -16         | 647      | PA  | 441     | AUG -> AGG   | M -> R       |  |
| 4              | 302          | G         | A      | 0.445     | -5623       | 4463     | HA  | 101     | AGU -> AAU   | S -> N       |  |
| 4              | 517          | A         | G      | 0.997     | -12914      | 3605     | HA  | 173     | AAU -> GAU   | N -> D       |  |
| 4              | 598          | U         | C      | 0.996     | -13820      | 3971     | HA  | 200     | UCU -> CCU   | S -> P       |  |
| 4              | 1218         | G         | U      | 0.406     | -7006       | 6212     | HA  | 406     | CAG -> CAU   | Q -> H       |  |
| 4              | 1355         | U         | A      | 0.015     | -114        | 6240     | HA  | 452     | UUG -> UAG   | none         |  |
| 4              | 1454         | A         | U      | 0.012     | -79         | 9807     | HA  | 485     | UAC -> UUC   | Y -> F       |  |
| 4              | 1460         | A         | G      | 0.014     | -118        | 10208    | HA  | 487     | AAA -> AGA   | K -> R       |  |
| 4              | 1472         | C         | A      | 0.014     | -147        | 11149    | HA  | 491     | ACG -> AAG   | T -> K       |  |
| 4              | 1542         | A         | G      | 0.010     | -100        | 14220    | HA  | 514     | AGA -> AGG   | none         |  |
| 5              | 215          | A         | C      | 0.029     | -305        | 7056     | NP  | 72      | GAU -> GCU   | D -> A       |  |
| 5              | 748          | A         | U      | 0.013     | -109        | 6863     | NP  | 250     | AAC -> UAC   | N -> Y       |  |
| 6              | 109          | U         | C      | 0.021     | -85         | 2702     | NA  | 37      | UCA -> CCA   | S -> P       |  |
| 6              | 164          | C         | A      | 0.458     | -3778       | 2799     | NA  | 55      | ACU -> AAU   | T -> N       |  |
| 6              | 256          | G         | A      | 0.029     | -121        | 2739     | NA  | 86      | GCG -> ACG   | A -> T       |  |
| 6              | 1120         | A         | G      | 0.027     | -122        | 3085     | NA  | 374     | AUU -> GUU   | I -> V       |  |

|   |      |   |    |       |        |       |     |     |            |        |
|---|------|---|----|-------|--------|-------|-----|-----|------------|--------|
| 6 | 1173 | A | G  | 0.026 | -147   | 3961  | NA  | 391 | CAA -> CAG | none   |
| 7 | 324  | G | A  | 0.705 | -23673 | 10403 | M1  | 108 | ACG -> ACA | none   |
| 7 | 479  | G | U  | 0.010 | -119   | 11263 | M1  | 160 | CGG -> CUG | R -> L |
| 7 | 773  | G | A  | 0.314 | -16296 | 18915 | M2  | 29  | GCA -> ACA | A -> T |
| 7 | 832  | U | UU | 0.022 | -117   | 19986 | M2  | 48  | FS**       | FS**   |
| 8 | 474  | A | G  | 0.548 | -38786 | 23949 | NS1 | 158 | GGA -> GGG | none   |
| 8 | 663  | A | G  | 0.010 | -335   | 37485 | NEP | 64  | AAG -> AGG | K -> R |

| MA vs Reference |      |   |   |       |        |       |     |     |             |           |
|-----------------|------|---|---|-------|--------|-------|-----|-----|-------------|-----------|
| 1               | 162  | A | G | 0.013 | -460   | 26101 | PB2 | 54  | AGA -> AGG  | none      |
| 1               | 196  | A | G | 0.012 | -230   | 15265 | PB2 | 66  | AUG -> GUG  | M -> V    |
| 1               | 217  | C | A | 0.032 | -597   | 12107 | PB2 | 73  | CAA -> AAA  | Q -> K    |
| 1               | 242  | C | A | 0.014 | -128   | 8440  | PB2 | 81  | ACA -> AAA  | T -> K    |
| 1               | 244  | A | C | 0.013 | -78    | 8316  | PB2 | 82  | AAC -> CAC  | N -> H    |
| 1               | 275  | C | G | 0.019 | -61    | 2104  | PB2 | 92  | UCA -> UGA* | S -> Stop |
| 1               | 282  | G | U | 0.013 | -21    | 1696  | PB2 | 94  | CUG -> CUU  | none      |
| 1               | 309  | C | U | 0.019 | -36    | 1296  | PB2 | 103 | GGC -> GGU  | none      |
| 1               | 338  | A | G | 0.016 | -22    | 1222  | PB2 | 113 | AAG -> AGG  | K -> R    |
| 1               | 340  | G | C | 0.013 | -18    | 1269  | PB2 | 114 | GUA -> CUA  | V -> L    |
| 1               | 353  | A | U | 0.012 | -14    | 1105  | PB2 | 118 | UAU -> UUU  | Y -> F    |
| 1               | 575  | A | G | 0.012 | -6     | 1096  | PB2 | 192 | GAG -> GGG  | E -> G    |
| 1               | 664  | G | A | 0.012 | -17    | 1128  | PB2 | 222 | GGC -> AGC  | G -> S    |
| 1               | 807  | A | G | 0.013 | -6     | 1235  | PB2 | 269 | AGA -> AGG  | none      |
| 1               | 1543 | C | A | 0.010 | -17    | 1758  | PB2 | 515 | CCC -> ACC  | P -> T    |
| 1               | 1928 | C | A | 0.015 | -40    | 2020  | PB2 | 643 | UCA -> UAA* | S -> Stop |
| 1               | 2021 | C | A | 0.019 | -119   | 6880  | PB2 | 674 | GCA -> GAA  | A -> E    |
| 1               | 2026 | A | U | 0.011 | -68    | 7278  | PB2 | 676 | ACU -> UCU  | T -> S    |
| 1               | 2142 | C | A | 0.014 | -326   | 21255 | PB2 | 714 | AGC -> AGA  | S -> R    |
| 1               | 2187 | G | A | 0.038 | -2445  | 40658 | PB2 | 729 | GGG -> GGA  | none      |
| 2               | 78   | A | G | 0.010 | -323   | 36526 | PB1 | 26  | GGA -> GGG  | none      |
| 2               | 200  | A | G | 0.013 | -240   | 12285 | PB1 | 67  | AAC -> AGC  | N -> S    |
| 2               | 237  | A | C | 0.015 | -182   | 10411 | PB1 | 79  | CCA -> CCC  | none      |
| 2               | 279  | U | C | 0.014 | -101   | 6695  | PB1 | 93  | GCU -> GCC  | none      |
| 2               | 466  | A | G | 0.363 | -5947  | 5829  | PB1 | 156 | ACA -> GCA  | T -> A    |
| 2               | 1023 | C | U | 0.996 | -23542 | 6574  | PB1 | 341 | CCC -> CCU  | none      |
| 2               | 1047 | A | U | 0.017 | -139   | 6092  | PB1 | 349 | GCA -> GCU  | none      |
| 2               | 1323 | C | A | 0.999 | -27241 | 7583  | PB1 | 441 | CUC -> CUA  | none      |
| 2               | 1891 | U | C | 0.034 | -447   | 8054  | PB1 | 631 | UUU -> CUU  | F -> L    |
| 2               | 1934 | U | A | 0.011 | -108   | 8813  | PB1 | 645 | GUA -> GAA  | V -> E    |
| 2               | 2218 | U | C | 0.498 | -10861 | 72743 | PB1 | 740 | UUC -> CUC  | F -> L    |
| 3               | 7    | G | A | 0.029 | -78    | 1669  | PA  | 3   | GAC -> AAC  | D -> N    |
| 3               | 9    | C | A | 0.023 | -58    | 1632  | PA  | 3   | GAC -> GAA  | D -> E    |
| 3               | 53   | R | G | 0.992 | -5368  | 1509  | PA  | 18  | GRA -> GGA  | X -> G    |
| 3               | 234  | A | U | 0.011 | -8     | 634   | PA  | 78  | AUA -> AUU  | none      |
| 3               | 246  | A | G | 0.011 | -6     | 563   | PA  | 82  | AGA -> AGG  | none      |
| 3               | 622  | A | G | 0.033 | -26    | 484   | PA  | 208 | ACA -> GCA  | T -> A    |
| 3               | 841  | A | U | 0.015 | -11    | 393   | PA  | 281 | AAG -> UAG* | K -> Stop |
| 3               | 1046 | A | G | 1.000 | -2132  | 592   | PA  | 349 | GAA -> GGA  | E -> G    |
| 3               | 1313 | U | G | 0.014 | -9     | 655   | PA  | 438 | AUC -> AGC  | I -> S    |
| 3               | 1322 | U | G | 0.017 | -16    | 647   | PA  | 441 | AUG -> AGG  | M -> R    |
| 4               | 302  | G | A | 0.445 | -5623  | 4463  | HA  | 101 | AGU -> AAU  | S -> N    |
| 4               | 517  | A | G | 0.997 | -12914 | 3605  | HA  | 173 | AAU -> GAU  | N -> D    |
| 4               | 598  | U | C | 0.996 | -13840 | 3971  | HA  | 200 | UCU -> CCU  | S -> P    |
| 4               | 716  | A | G | 0.995 | -14169 | 4083  | HA  | 239 | GAU -> GGU  | D -> G    |
| 4               | 1218 | G | U | 0.406 | -7006  | 6212  | HA  | 406 | CAG -> CAU  | Q -> H    |
| 4               | 1355 | U | A | 0.015 | -114   | 6240  | HA  | 452 | UUG -> UAG  | none      |
| 4               | 1454 | A | U | 0.012 | -79    | 9807  | HA  | 485 | UAC -> UUC  | Y -> F    |
| 4               | 1460 | A | G | 0.014 | -118   | 10208 | HA  | 487 | AAA -> AGA  | K -> R    |
| 4               | 1472 | C | A | 0.014 | -147   | 11149 | HA  | 491 | ACG -> AAG  | T -> K    |
| 4               | 1542 | A | G | 0.010 | -100   | 14220 | HA  | 514 | AGA -> AGG  | none      |

|   |      |   |    |       |        |       |     |     |            |        |
|---|------|---|----|-------|--------|-------|-----|-----|------------|--------|
| 5 | 159  | U | G  | 0.996 | -25567 | 7357  | NP  | 53  | GAU -> GAG | D -> E |
| 5 | 215  | A | C  | 0.029 | -305   | 7056  | NP  | 72  | GAU -> GCU | D -> A |
| 5 | 341  | R | A  | 0.998 | -25499 | 7109  | NP  | 114 | GRA -> GAA | X -> E |
| 5 | 365  | U | A  | 0.999 | -25866 | 7195  | NP  | 122 | CUA -> CAA | L -> Q |
| 5 | 748  | A | U  | 0.013 | -109   | 6863  | NP  | 250 | AAC -> UAC | N -> Y |
| 6 | 109  | U | C  | 0.021 | -85    | 2702  | NA  | 37  | UCA -> CCA | S -> P |
| 6 | 164  | C | A  | 0.458 | -3778  | 2799  | NA  | 55  | ACU -> AAU | T -> N |
| 6 | 256  | G | A  | 0.029 | -121   | 2739  | NA  | 86  | GCG -> ACG | A -> T |
| 6 | 1052 | A | U  | 0.998 | -10876 | 3115  | NA  | 351 | UAC -> UUC | Y -> F |
| 6 | 1059 | U | C  | 0.996 | -11294 | 3157  | NA  | 353 | UAU -> UAC | none   |
| 6 | 1120 | A | G  | 0.027 | -122   | 3085  | NA  | 374 | AUU -> GUU | I -> V |
| 6 | 1173 | A | G  | 0.026 | -147   | 3961  | NA  | 391 | CAA -> CAG | none   |
| 7 | 324  | G | A  | 0.705 | -23673 | 10403 | M1  | 108 | ACG -> ACA | none   |
| 7 | 479  | G | U  | 0.010 | -119   | 11263 | M1  | 160 | CGG -> CUG | R -> L |
| 7 | 773  | G | A  | 0.314 | -16296 | 18915 | M2  | 29  | GCA -> ACA | A -> T |
| 7 | 832  | U | UU | 0.022 | -117   | 19986 | M2  | 48  | FS**       | FS**   |
| 8 | 474  | A | G  | 0.548 | -38786 | 23949 | NS1 | 158 | GGA -> GGG | none   |
| 8 | 663  | A | G  | 0.010 | -335   | 37485 | NEP | 64  | AAG -> AGG | K -> R |

| Parental vs Reference |      |   |   |       |        |       |     |     |            |        |
|-----------------------|------|---|---|-------|--------|-------|-----|-----|------------|--------|
| 1                     | 207  | G | C | 0.018 | -237   | 8165  | PB2 | 69  | GAG -> GAC | E -> D |
| 1                     | 265  | G | C | 0.011 | -49    | 3218  | PB2 | 89  | GUG -> CUG | V -> L |
| 1                     | 462  | C | U | 0.022 | -55    | 1690  | PB2 | 154 | CUC -> CUU | none   |
| 1                     | 696  | G | A | 0.015 | -37    | 1832  | PB2 | 232 | UUG -> UUA | none   |
| 1                     | 1073 | A | C | 0.015 | -14    | 1863  | PB2 | 358 | GAA -> GCA | E -> A |
| 1                     | 1311 | U | C | 0.013 | -40    | 2356  | PB2 | 437 | CAU -> CAC | none   |
| 1                     | 1445 | A | G | 0.014 | -46    | 2385  | PB2 | 482 | AAA -> AGA | K -> R |
| 1                     | 1711 | U | C | 0.163 | -1198  | 3036  | PB2 | 571 | UUA -> CUA | none   |
| 1                     | 2052 | U | C | 0.017 | -272   | 15001 | PB2 | 684 | UCU -> UCC | none   |
| 2                     | 760  | U | C | 0.016 | -218   | 9780  | PB1 | 254 | UUU -> CUU | F -> L |
| 2                     | 1023 | C | U | 0.297 | -8748  | 10899 | PB1 | 341 | CCC -> CCU | none   |
| 2                     | 1464 | G | A | 0.067 | -1444  | 10629 | PB1 | 488 | GGG -> GGA | none   |
| 3                     | 53   | R | A | 0.898 | -8660  | 2801  | PA  | 18  | GRA -> GAA | X -> E |
| 3                     | 53   | R | G | 0.099 | -607   | 2801  | PA  | 18  | GRA -> GGA | X -> G |
| 3                     | 183  | A | U | 0.011 | -20    | 1501  | PA  | 61  | AUA -> AUU | none   |
| 3                     | 228  | U | C | 0.014 | -20    | 1051  | PA  | 76  | UUU -> UUC | none   |
| 3                     | 1848 | G | A | 0.011 | -26    | 1981  | PA  | 616 | UCG -> UCA | none   |
| 4                     | 165  | C | A | 0.019 | -204   | 7500  | HA  | 55  | AAC -> AAA | N -> K |
| 4                     | 166  | G | A | 0.012 | -113   | 7493  | HA  | 56  | GGG -> AGG | G -> R |
| 4                     | 171  | A | U | 0.018 | -192   | 7337  | HA  | 57  | AAA -> AAU | K -> N |
| 4                     | 172  | C | A | 0.013 | -116   | 7424  | HA  | 58  | CUA -> AUA | L -> I |
| 4                     | 424  | A | G | 0.473 | -8102  | 5776  | HA  | 142 | AAU -> GAU | N -> D |
| 4                     | 432  | C | A | 0.052 | -567   | 5881  | HA  | 144 | GAC -> GAA | D -> E |
| 4                     | 437  | A | G | 0.068 | -788   | 5719  | HA  | 146 | AAC -> AGC | N -> S |
| 4                     | 511  | A | G | 0.039 | -395   | 5370  | HA  | 171 | AAA -> GAA | K -> E |
| 4                     | 598  | U | C | 0.228 | -3613  | 6127  | HA  | 200 | UCU -> CCU | S -> P |
| 4                     | 622  | C | A | 0.101 | -1362  | 6144  | HA  | 208 | CUC -> AUC | L -> I |
| 4                     | 716  | A | G | 0.539 | -10487 | 6609  | HA  | 239 | GAU -> GGU | D -> G |
| 4                     | 719  | A | G | 0.018 | -173   | 6657  | HA  | 240 | CAA -> CGA | Q -> R |
| 4                     | 1433 | G | A | 0.022 | -335   | 10568 | HA  | 478 | GGA -> GAA | G -> E |
| 5                     | 159  | U | G | 0.676 | -17278 | 7995  | NP  | 53  | GAU -> GAG | D -> E |
| 5                     | 302  | A | G | 0.031 | -479   | 9687  | NP  | 101 | GAC -> GGC | D -> G |
| 5                     | 304  | G | A | 0.265 | -6784  | 9637  | NP  | 102 | GGA -> AGA | G -> R |
| 5                     | 324  | C | U | 0.270 | -7248  | 10439 | NP  | 108 | CUC -> CUU | none   |
| 5                     | 341  | R | A | 0.993 | -36918 | 10377 | NP  | 114 | GRA -> GAA | X -> E |
| 5                     | 365  | U | A | 0.998 | -38140 | 10620 | NP  | 122 | CUA -> CAA | L -> Q |
| 6                     | 17   | A | G | 0.011 | -37    | 2947  | NA  | 6   | AAG -> AGG | K -> R |
| 6                     | 258  | G | A | 0.019 | -113   | 3863  | NA  | 86  | GCG -> GCA | none   |
| 6                     | 1052 | A | U | 0.996 | -19144 | 5347  | NA  | 351 | UAC -> UUC | Y -> F |
| 6                     | 1059 | U | C | 0.996 | -19523 | 5455  | NA  | 353 | UAU -> UAC | none   |

|   |     |   |   |       |       |       |     |     |            |        |
|---|-----|---|---|-------|-------|-------|-----|-----|------------|--------|
| 7 | 177 | U | C | 0.012 | -202  | 14062 | MI  | 59  | AUU -> AUC | none   |
| 8 | 42  | C | U | 0.019 | -806  | 31645 | NS1 | 14  | UUC -> UUU | none   |
| 8 | 214 | G | A | 0.026 | -1476 | 37724 | NS1 | 72  | GAA -> AAA | E -> K |
| 8 | 355 | U | C | 0.018 | -991  | 38197 | NS1 | 119 | UUG -> CUG | none   |
| 8 | 817 | U | C | 0.010 | -459  | 38088 | NEP | 115 | GCU -> GCC | none   |

**Nucleotide substitutions identified by deep sequencing.** Sequencing reads were aligned to reference genomes for each segment as described in materials and methods section. Differences between the mouse-adapted CA/07-MA sequence and parental CA/07 sequence (MA vs Parental), the mouse-adapted CA/07-MA and reference sequence (MA vs Reference), and the parental CA/07 and reference sequence (Parental vs Reference) found at frequencies above 0.01 are presented in the table.

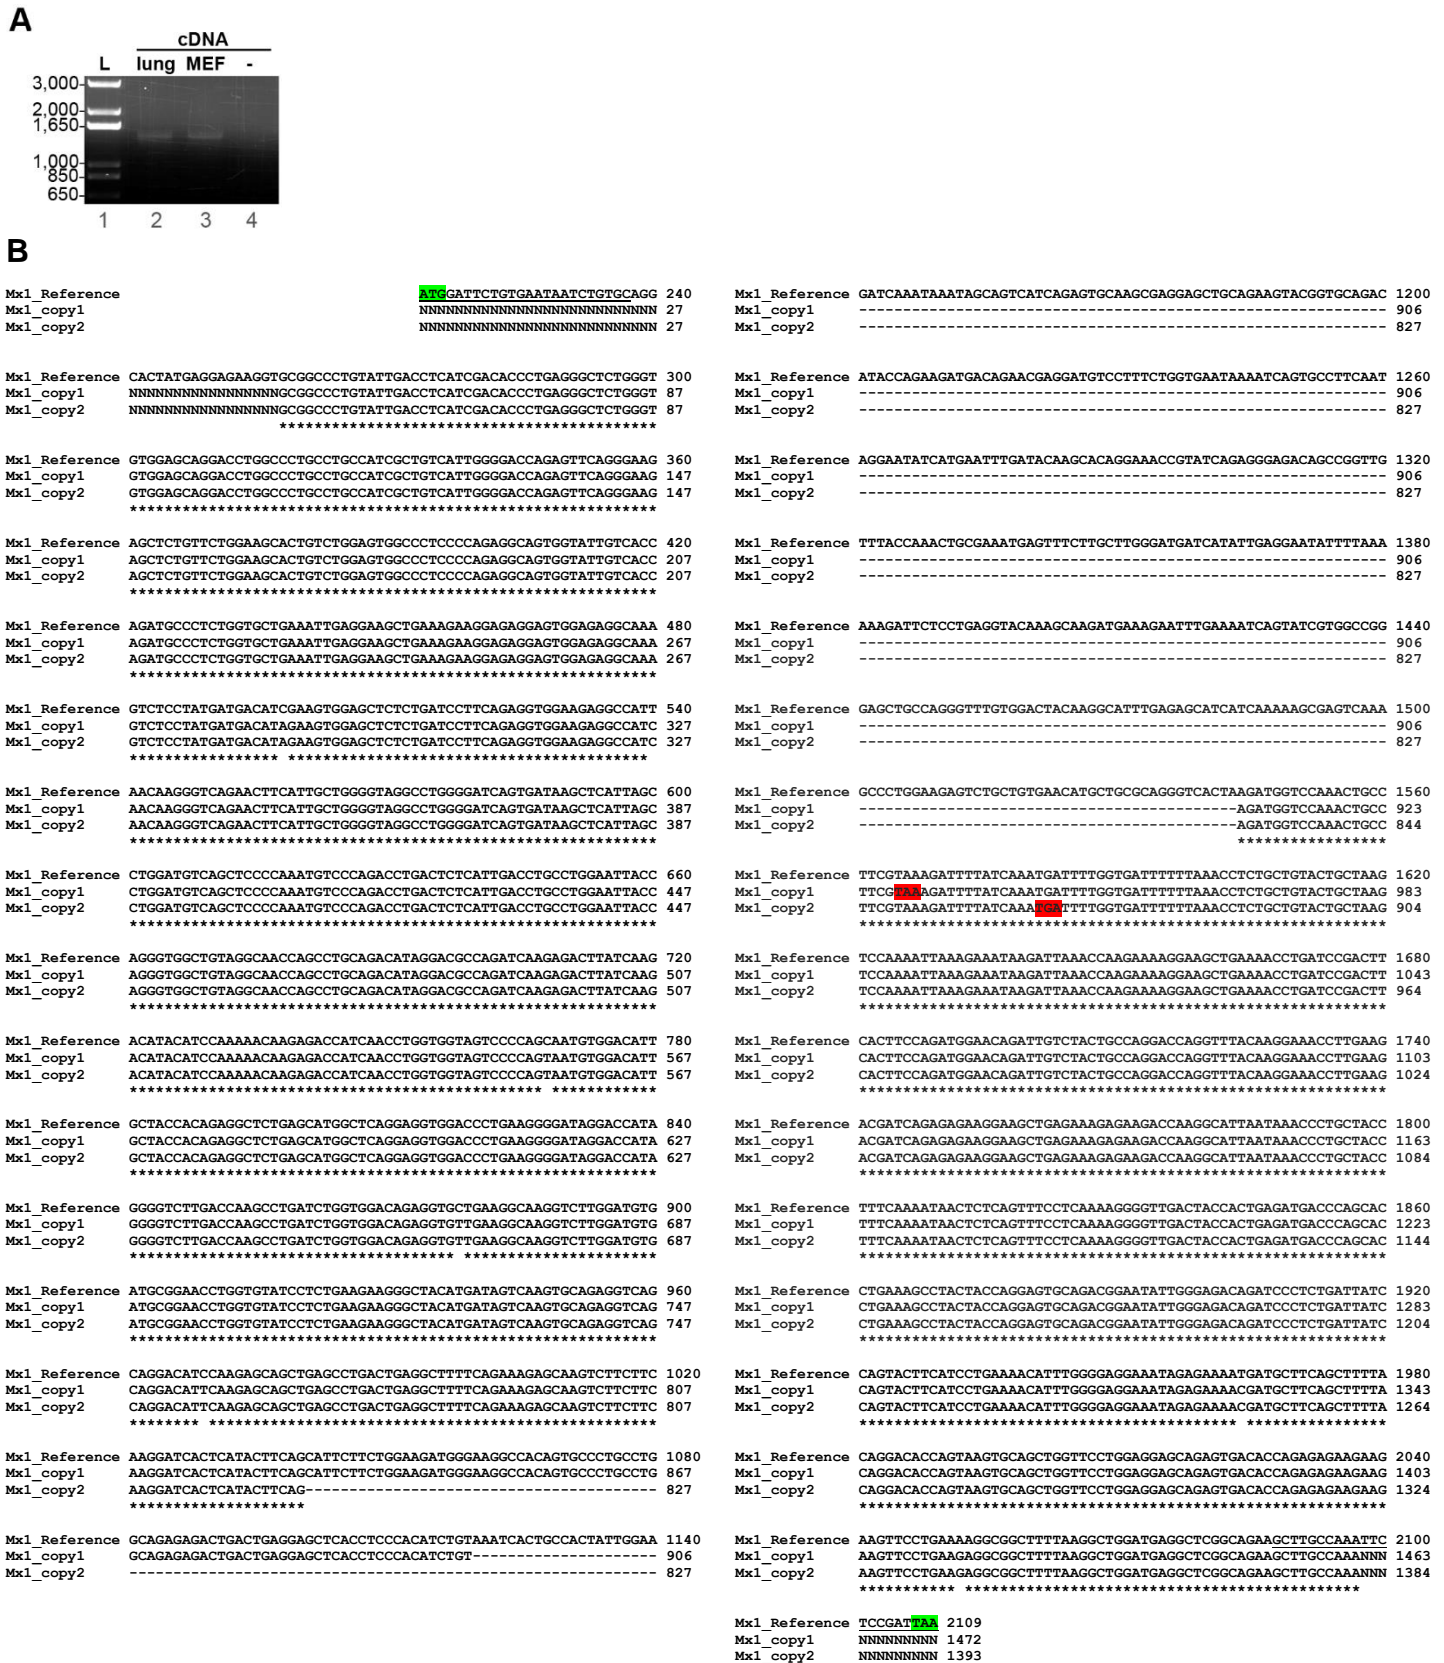

**Figure S1. Outbred Swiss Webster mice have non-functional Mx1.** Total RNA was extracted from a Swiss Webster mouse lung homogenate collected at 3 days post-infection with passage 10 CA/07-MA virus (lung) and from mouse embryonic fibroblasts originating from C57BL/6 strain (MEF). (A) Following reverse transcription using Maxima H Minus reverse transcriptase (Thermo) and oligo(dT) priming the coding sequences of Mx1 cDNA were amplified and the products were resolved on 1% agarose gel stained with ethidium bromide (expected product size for the full-length Mx1 coding region is 1896 bp). PCR product from lane 2 (lung) was gel-extracted and sequenced. Sequencing revealed that the gel-extracted band contained two Mx1 amplicons: 1472 bp and 1393 bp

that were not resolved by electrophoresis. Both sequences were aligned to the reference Mx1 sequence (NM\_010846) using Clustal Omega (<https://www.ebi.ac.uk/Tools/msa/clustalo/>) and the portions of the alignment corresponding to the full-length Mx1 coding sequence are presented in (B). Sequences that correspond to primers used for amplification are underlined. The start and stop codons for the full-length Mx1 are highlighted green. Premature stop codons that resulted from deletions in both copies of Mx1 amplified from Swiss Webster mouse lung cDNA are highlighted red.

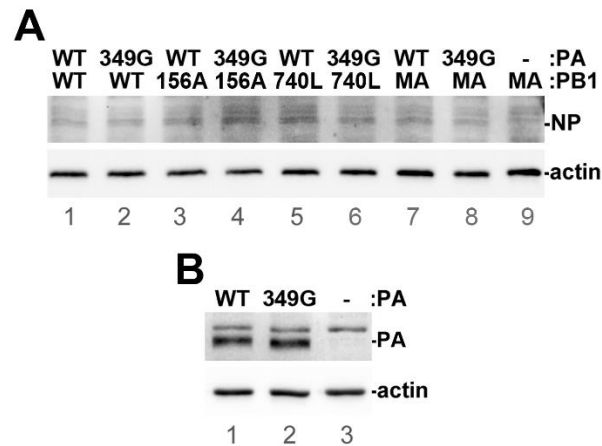

**Figure S2. Wild-type and E349G PA are expressed at similar levels in mouse L cells.** (A) Western blot analysis of the whole cell lysates of L cells transfected with 5 plasmids encoding the reconstituted minireplicon and the control pGL4.74(hRLuc/TK) plasmid. PB1 and PA variants compared in the minireplicon assay are indicated. Due to low levels of protein expression from pHW vectors in a 6-vector mix, very low signal for NP could be detected in lanes 1-8 and no signal for PA could be detected (not shown). (B) Western blot analysis of the whole cell lysates of L cells transfected with either wild-type (WT) or E349G mutant (349G) pHW-PA expression vectors alone, or the empty vector control (-), showing comparable expression levels of PA proteins.

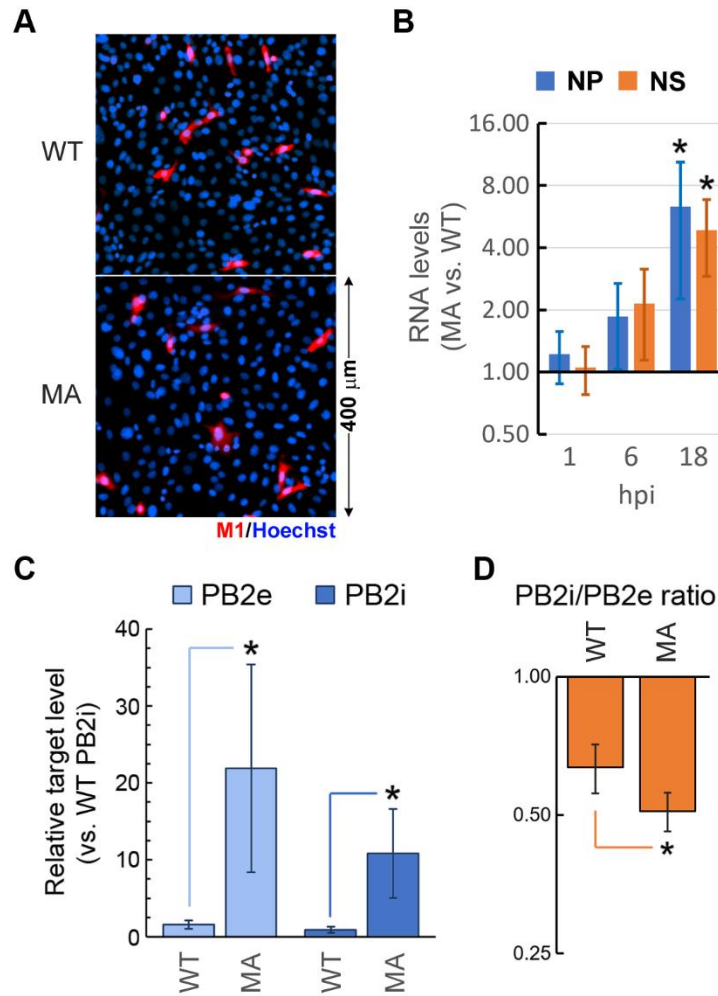

**Figure S3. Efficient replication of the mouse-adapted CA/07-MA virus genome in mouse cells.** Mouse embryonic fibroblasts were infected with parental CA/07 or the mouse-adapted CA/07-MA viruses at an MOI of 0.03. A) Cells were fixed at 18 hpi and analysed by immunofluorescence microscopy staining with anti-M1 antibody (red); nuclei were labelled with Hoechst dye (blue). B) Total RNA isolated at 1, 6 and 18 hpi was analysed by RT-qPCR to measure levels of IAV NP and NS genome segments. Values were normalized to 18S rRNA levels, and expressed as a ratio of CA/07-MA to parental CA/07. C) Relative levels of total PB2-derived genomic segments (PB2e, light blue) and the full-length PB2 vRNAs (PB2i, blue) were measured by RT-qPCR (18 hpi) using PB2e and PB2i primer pairs, respectively. D) PB2i to PB2e ratios calculated from (C) were plotted. B-D). Error bars represent standard deviation (n=3). \* = p value <0.05, Student's t-test.
